# scJoint: transfer learning for data integration of atlas-scale single-cell RNA-seq and ATAC-seq

Yingxin Lin<sup>1,2§</sup>, Tung-Yu Wu<sup>3§</sup>, Sheng Wan<sup>4</sup>, Jean Y.H. Yang<sup>1,2</sup>, Wing H.  
Wong<sup>3,5,6\*</sup>, and Y. X. Rachel Wang<sup>1\*</sup>

<sup>1</sup>School of Mathematics and Statistics, The University of Sydney, NSW, Australia.

<sup>2</sup>Charles Perkins Centre, The University of Sydney, NSW, Australia.

<sup>3</sup>Department of statistics, Stanford University, CA, USA.

<sup>4</sup>Institute of Electronics, National Chiao Tung University, Hsinchu, Taiwan.

<sup>5</sup>Department of Biomedical Data Science, Stanford University, CA, USA.

<sup>6</sup>Bio-X Program, Stanford University, CA, USA.

<sup>§</sup>Equal contribution.

\*To whom correspondence should be addressed. Email: Y. X. Rachel Wang,  
rachel.wang@sydney.edu.au; Wing H. Wong, whwong@stanford.edu.

## Abstract

Single-cell multi-omics data continues to grow at an unprecedented pace, and effectively integrating different modalities holds the promise for better characterization of cell identities. Although a number of methods have demonstrated promising results in integrating multiple modalities from the same tissue, the complexity and scale of data compositions typically present in cell atlases still pose a significant challenge for existing methods. Here we present scJoint, a transfer learning method to integrate atlas-scale, heterogeneous collections of scRNA-seq and scATAC-seq data. scJoint leverages information from annotated scRNA-seq data in a semi-supervised framework and uses a neural network to simultaneously train labeled and unlabeled data, enabling label transfer and joint visualization in an integrative framework. Using multiple atlas data and a biologically varying multi-modal data, we demonstrate scJoint is computationally efficient and

25 consistently achieves significantly higher cell type label accuracy than existing methods while  
26 providing meaningful joint visualizations. This suggests scJoint is effective in overcoming the  
27 heterogeneity in different modalities towards a more comprehensive understanding of cellular  
28 phenotypes.

## 29 **Introduction**

30 Advances in single-cell technologies have enabled comprehensive studies of cell heterogeneity,  
31 developmental dynamics, and cell communications across diverse biological systems at an  
32 unprecedented resolution. There are a variety of protocols profiling the transcriptomics, as ex-  
33 emplified by single-cell RNA-seq (scRNA-seq). In addition, a number of technologies have been  
34 developed for other molecular measurements in individual cells towards building a more holistic  
35 view of cell functions, including chromatin accessibility, protein abundance, and methylation [1].

36  
37 In particular, single-cell ATAC-seq (scATAC-seq) is an epigenomic profiling technique  
38 for measuring chromatin accessibility to discover cell type specific regulatory mechanisms  
39 [2, 3]. scATAC-seq offers a complementary layer of information to scRNA-seq, and together  
40 they provide a more comprehensive molecular profile of individual cells and their identities.  
41 However, it has been noted that the extreme sparsity of scATAC-seq data often limits its power  
42 in cell type identification [4]. In contrast, large amounts of well-annotated scRNA-seq datasets  
43 have been curated as cell atlases [5, 6], motivating us to transfer cell type information from  
44 scRNA-seq to scATAC-seq for better classification of cell types in an integrative analysis  
45 framework.

46  
47 A number of methods exist to denoise, batch correct, and perform integration of single-omics  
48 data across multiple experiments for both transcriptomic data [7–12] and scATAC-seq data  
49 [13]. However, direct applications of these methods to multi-omics data integration are com-  
50 putationally challenging and often suboptimal, since different modalities have vastly different  
51 dimensions and sparsity levels. Recently, a growing number of methods have been proposed to  
52 address the need for integrative analysis across different modalities. When the data consist of  
53 simultaneous multi-modal measurements within the same cell [14, 15], methods like scAI [16]  
54 and MOFA+ [17] have been developed based on factor analysis and joint clustering. In general,  
55 these paired measurements are technically more challenging and costly to perform.

56

57 More commonly, different modalities are derived from different cells taken from the same  
58 or similar populations. In this setting, most existing methods can be broadly divided into  
59 four categories: manifold alignment [18–20], matrix factorization (Liger [21], coupledNMF  
60 [22]), using correlations to identify nearby cells across modalities (Conos [23], Seurat [24]),  
61 or neural network approaches, each with its own limitations when facing complex data com-  
62 positions as typically seen in cell atlases. Manifold alignment methods have demonstrated  
63 promising results in integrating multiple modalities from the same tissue. However, requiring  
64 distributions to match globally is often too restrictive when different modalities are derived  
65 from different tissues and cell types. Furthermore, matrix factorization and correlation-based  
66 methods designed for unpaired data require a separate feature selection step prior to inte-  
67 gration for dimension reduction, and the method’s performance is sensitive to which genes  
68 are selected. Most existing neural network methods for multi-omics integration are based  
69 on autoencoders which, with the exception of few [25], require paired data. In general,  
70 unsupervised training of multiple autoencoders simultaneously can be very challenging without  
71 pairing information across different modalities, with finding a common embedding manifold  
72 becomes more challenging as the complexity of the data increases. Hence, current methods are  
73 limited in their ability to handle the complexity and scale that characterize multi-omics atlas data.

74

75 Here, we present a novel scalable transfer learning method, scJoint, that effectively integrates  
76 atlas-scale scRNA-seq and scATAC-seq data using a neural network approach (Figure 1a).  
77 We achieve this by taking advantage of the increasing amount of scRNA-seq data with high  
78 quality annotations and incorporating the cell type label information into a semi-supervised  
79 paradigm to train unlabeled scATAC-seq. scJoint is able to meet the challenges in integrating  
80 multi-omics atlas data through the use of (1) a *novel loss function* to explicitly incorporate  
81 dimension reduction as part of the feature engineering process in transfer learning, allowing the  
82 low dimensional features to be updated throughout training and *removing the need* for selecting  
83 highly variable genes; (2) a similarity loss that adds flexibility to the alignment of modalities  
84 when their cell types do not fully overlap; (3) weight sharing across encoders for different  
85 modalities resulting in stable training.

86

87 We illustrate scJoint’s performance in terms of label transfer accuracy, quality of joint vi-  
88 sualizations, scalability and capacity to generalize. In particular, we highlight the scalability of

89 scJoint through the integration of two mouse atlases [5, 26] and two human fetal atlases [27, 28].  
90 In the latter case, scJoint required only two hours to integrate over a million cells (Figure 1c)  
91 while consistently maintaining high accuracy rates. The generalizability of scJoint to other types  
92 of single-cell data is demonstrated through a multi-modal data with paired protein measurements  
93 (CITE-seq and ASAP-seq, Figure 1b).

## 94 **Results**

### 95 **scJoint for co-training labeled and unlabeled data**

96 The core of scJoint is a semi-supervised approach to co-train labeled data (scRNA-seq) and  
97 unlabeled data (scATAC-seq), where we address the main challenge of aligning these two  
98 distinct data modalities via a common lower dimensional space. scJoint consists of three  
99 main steps (Figure 1a). Step 1 performs joint dimension reduction and modality alignment  
100 in a common embedding space through a novel neural network based dimension reduction  
101 (NNDR) loss and a cosine similarity loss respectively. The NNDR loss extracts orthogonal  
102 features with maximal variability in a vein similar to PCA, while the cosine similarity loss  
103 encourages the neural network to find projections into the embedding space so that majority  
104 parts of the two modalities can be aligned. The embedding of scRNA-seq is further guided by  
105 a cell type classification loss, forming the semi-supervised part. In Step 2, treating each cell  
106 in scATAC-seq data as a query, we identify the k-nearest neighbors (KNN) among scRNA-seq  
107 cells by measuring their distances in the common embedding space, and transfer the cell type  
108 labels from scRNA-seq to scATAC-seq via majority vote. In Step 3, we further improve the  
109 mixing between the two modalities by utilising the transferred labels in a metric learning loss.  
110 Joint visualization of the datasets is obtained from the final embedding layer using standard  
111 tools including tSNE [29] and UMAP [30]. scJoint requires simple data preprocessing with the  
112 input dimension equal to the number of genes in the given datasets after appropriate filtering.  
113 Chromatin accessibility in scATAC-seq data is first converted to gene activity scores [31, 32]  
114 allowing for the use of a single encoder with weight sharing for both RNA and ATAC.

115

116 We next compared scJoint with methods recently developed and applied to the integration of  
117 scRNA-seq and scATAC-seq, including Seurat v3 [24], Conos [23] for label transfer accuracy,  
118 and additionally Liger [21] (as a representative matrix factorization method) for evaluating the

119 joint embedding of the two modalities.

## 120 **scJoint shows accurate and robust performance on large atlas data.**

121 We demonstrate the performance of scJoint in a complex scenario, where the heterogeneity of  
122 cell types and tissues in atlas data poses significant challenges to data integration. We applied  
123 our method to integrate two mouse cell atlases: the Tabula Muris atlas [5] for scRNA-seq data  
124 and the atlas in [26] for scATAC-seq data, containing 73 cell types (96,404 cells from 20 organs,  
125 two protocols) and 29 cell types (81,173 cells from 13 tissues) respectively (the latter including  
126 a group annotated as “unknown”), of which 19 cell types are common. We focus our initial  
127 evaluation on the subset of the atlas data containing 101,692 cells from the 19 overlapping  
128 cell types only. Here, we transferred cell type labels from scRNA-seq to scATAC-seq and  
129 compared the results with the original labels in [26] for accuracy; these original labels were also  
130 used to evaluate the quality of joint visualizations. An inspection of the tSNE plots shows our  
131 method effectively mixes the three protocols (FACS, droplet, ATAC) while providing a better  
132 grouping of the cells in terms of previously defined cell types than the other methods (Figure  
133 2a, Supplementary Figure S1). This observation is confirmed by the quantitative evaluation  
134 metrics, with scJoint showing significantly higher cell type silhouette coefficients than all the  
135 other methods and similar modality silhouette coefficients as Seurat and Liger. Overall, scJoint  
136 has the highest median F1-score of silhouette coefficients, achieving a better trade-off between  
137 removing the technological variations in modalities and maintaining the cell type signals (Figure  
138 2b, Supplementary Figure S2). In terms of label transfer accuracy, scJoint assigned 84% of the  
139 cells to the correct type, 14% and 13% higher than Seurat and Conos (Figure 2d, Supplementary  
140 Figure S3).

141  
142 To assess the robustness of the label transfer results, we performed a stability analysis on  
143 this subset of atlas data by subsampling 80%, 50%, 20% of the cells from scRNA-seq as the  
144 training data. Even when only 20% of the cells were used for training, scJoint maintained a  
145 high accuracy and small variance (Figure 2c), suggesting that scJoint is potentially applicable to  
146 situations where only a subset of the scRNA-seq data is annotated.

147  
148 To evaluate scJoint’s computational efficiency on atlas-sized data, we further considered two  
149 human fetal atlases [27, 28] and created benchmark datasets by subsampling from 15 organs with

150 54 cell types common between scRNA-seq and scATAC-seq. The size of the datasets ranged from  
151 10,000 to 1,089,769 cells. scJoint was significantly faster than Seurat and Liger, being the only  
152 method capable of handling over 1 million cells (2 hours using a single thread for PyTorch, Figure  
153 1c, Supplementary Figure S4). scJoint consistently achieved much higher accuracy than the other  
154 methods, with an average 20% improvement for 100,000 or more cells (Figure 1d). Together,  
155 these results illustrate that scJoint scales well to large atlas data both in terms of computational  
156 efficiency and quality of results.

## 157 **Label transfer using highly heterogeneous atlas data refines cell type anno-** 158 **tations in scATAC-seq.**

159 We next performed the more challenging task of integrating full atlas data, using the mouse  
160 atlases as an example. Since the scRNA-seq atlas contains more cell types than the scATAC-seq  
161 atlas, we use this application to illustrate how transferred labels can refine and provide new  
162 annotations to ATAC cells. To compare with the original labels, tSNE plots were constructed  
163 in the same way as [26], using singular value decomposition of the term frequency-inverse  
164 document frequency (TF-IDF) transformation of scATAC-seq peak matrix (Figure 3a). We  
165 observe that scJoint labels cells close together in this ATAC visualization space in a more  
166 consistent way than the other methods. Qualitatively this is supported by scJoint's higher overall  
167 accuracy rate (77% compared with 60% for Seurat and 55% for Conos).

168

169 Examining the transferred labels further, we find scJoint labels a group of cells (originally  
170 labeled as “unknown” or “endothelials”) as “stromal cells” (4352 cells) and “fibroblasts” (1602  
171 cells), which are two cell types not present in the original ATAC labels. These cells show high  
172 gene activity scores for *Coll1a1*, *Coll1a2*, *Dcn* and *Ccdc80*, all of which are markers with high  
173 expression levels in stromal cells and fibroblasts but low expression levels in endothelial cells  
174 from the scRNA-seq data (Figure 3b). Hence, the new annotations are more consistent with the  
175 marker expression levels.

176

177 More interestingly, we note scJoint allows us to annotate 5931 cells labeled as ‘unknown’  
178 in [26] with probability score greater than 0.80. These cells are clearly clustered into groups  
179 in the tSNE visualization of scJoint's embedding space (Figure 3c), with the main groups being  
180 endothelial cells, stromal cells, neurons and B cells. Using cell type markers identified from the

181 scRNA-seq data, the aggregated gene activity scores of these ATAC cells show clear differential  
182 expression patterns (Figure 3d).

### 183 **scJoint enables accurate integration of single-cell multi-modal data across** 184 **biological conditions.**

185 We demonstrate scJoint is capable of incorporating additional modality information to RNA-seq  
186 and ATAC-seq and applicable to experiments with different underlying biological conditions.  
187 We consider multi-modal measurements profiling gene expression levels or chromatin acces-  
188 sibility simultaneously with surface protein levels, which can be obtained via CITE-seq [33]  
189 and ASAP-seq [34]. We analyzed CITE-seq and ASAP-seq data from a T cell stimulation  
190 experiment in [34], which sequenced cells with these two technologies in parallel. A total  
191 of 18,088 cells were studied under two conditions: one with stimulation of anti-CD3/CD28  
192 in the presence of IL-2 for 16 hours and the other without stimulation as control. We first  
193 clustered and annotated these cells using CiteFuse [35]. Compared to the cell type labels in the  
194 original study, we were able to identify cellular subtypes with CiteFuse, further annotating five  
195 subgroups in T cells. Next, we performed integration analysis of CITE-seq and ASAP-seq by  
196 concatenating gene expression or gene activity vectors with protein measurements. The analysis  
197 was performed in two scenarios: within the stimulated and control condition separately and  
198 across the two conditions.

199  
200 In both scenarios, scJoint generated a better joint visualization of the two technologies  
201 (Figure 4a, Supplementary Figures S5, S6). In particular, in the case where stimulated and  
202 control cells are combined, subtypes of T cells (e.g. naive CD8+, effector CD8+, naive CD4+,  
203 and effector CD4+) are clearly separated while cells from the two technologies are well mixed  
204 (Figure 4a-b). The median cell type silhouette coefficient of scJoint is 0.51, outperforming  
205 the other three methods by a large margin (Seurat 0.11, Conos 0.13, and Liger -0.06). With  
206 the highest silhouette coefficient F1 scores (median F1 score: 0.59) representing a 16% - 28%  
207 improvement over the other methods, scJoint demonstrates the best balance between removing  
208 technical variations and preserving biological signals (Figure 4c, Supplementary Figure S7).

209  
210 Moreover, scJoint achieves higher accuracy in label transfer under all scenarios (88% in  
211 control, 84% in stimulation, and 87% in the combined case), compared with Seurat (80% in

212 control, 79% in stimulation, and 75% combined) and Conos (53% in control, 67% in stimulation,  
213 and 56% in combined) (Figure 4d and Supplementary Figure S8). In addition, the transferred  
214 labels of scJoint from the two scenarios (control / stimulation alone, and combined) are highly  
215 consistent, with 95% of cells having the same annotation, substantially greater than Seurat (84%)  
216 and Conos (59%) (Supplementary Figure S9).

## 217 **Integration of multi-modal data with scJoint captures additional biological** 218 **signals in cell types and conditions**

219 In the combined analysis of stimulation and control, we find that the joint embedding generated  
220 by scJoint contains additional information that allows for the identification of a cellular  
221 subtype. In the CiteFuse annotation of ASAP-seq data, we labeled one cluster of 142 cells with  
222 ambiguous marker expression as “unknown”. Interestingly, in the joint visualization of scJoint,  
223 while these “unknown” cells are labeled as “natural killer cells (NK)” by label transfer, they are  
224 still clearly separated from the majority of NK cells and form a small cluster together with cells  
225 from CITE-seq. We then examined the gene and protein expression levels of NK cell and T cell  
226 markers in this subgroup. We find these cells have high expression of CD3 and GNLY at gene  
227 level as well as CD3, CD56, CD57, and CD244 at protein level, but low expression of CD8A  
228 and CD4. This suggests these cells may be natural killer T cells, a minority of immune cells in  
229 PBMC sample (Figure 4e, Supplementary Figure S10) [36]. By contrast, although these cells  
230 lack CD8 expression, the other methods are unable to distinguish them from effector CD8+ T  
231 cells in their visualizations (Figure 4e, Supplementary Figure S11).

232

233 Lastly, by appropriately aligning the two technologies in the embedding space, scJoint is able  
234 to reveal the biological difference between stimulation and control within the same cell type. In  
235 the joint visualization of scJoint, three subtypes of T cells (naive CD4+, naive CD8+, effector  
236 CD4+) are less well mixed between the two conditions than the other cell types, consistent with  
237 the stimulation experiment aiming to activate T cells. In particular, the naive CD4+ T cells show  
238 the most notable separation between the two conditions (Figure 4a). We then performed differ-  
239 ential expression analysis of the scRNA-seq part of CITE-seq within each cell type across the  
240 two conditions using MAST [37]. We find that the naive CD4+ T cells have the largest number  
241 of unique differentially expressed genes ( $FDR < 0.01$ ) (Supplementary Figure S12a). Simi-  
242 larly, differential proteins analysis of both CITE-seq and ATAC-seq using wilcoxon rank sum



243 test on the log-transformed protein abundances also suggests that naive CD4+ T cells have the  
244 most unique differential proteins compared with other cell types ( $FDR < 0.01$ ) (Supplementary  
245 Figure S12b-c).

## 246 **scJoint shows versatile performance on paired measurements of scRNA-seq** 247 **and scATAC-seq.**

248 Although scJoint is designed for integrating unpaired data, it is still directly applicable to paired  
249 data. Such an application also enables us to compare its performance with methods that incor-  
250 porate pairing information and use the pairing information to validate the label transfer results.  
251 We consider the integration of adult mouse cerebral cortex data generated by SNARE-seq [14],  
252 a technology that can profile gene expression and chromatin accessibility in the same cell. In  
253 addition to Seurat and Liger, we compared scJoint with two other methods designed specifically  
254 for paired data, scAI [16] and MOFA+ [17]. In our assessment, all the unpaired methods (scJoint,  
255 Seurat, Liger) treat the RNA and ATAC parts of SNARE-seq as two separate datasets, while the  
256 paired methods take the pairing information into account. We find that scJoint is able to provide  
257 clear groupings of cells according to cellular subtypes (Figure 5a) and achieves comparable or  
258 better cell type silhouette coefficients (Figure 5b) than the paired methods. This suggests that  
259 scJoint is versatile enough to be applied to paired data, which are becoming increasingly popular.

260  
261 Comparing the performance among the unpaired methods, scJoint has the highest medians  
262 in cell type silhouette coefficients and F1-scores (Figure 5b, Supplementary Figure S14). For  
263 label transfer, scJoint achieves an accuracy rate of 70.9%, retaining better performance than the  
264 other two methods (70.1% for Seurat and 49.5% for Conos). Looking closer at the performance  
265 in each cell type, scJoint performs the best in 10 out of 22 cell types in terms of F1 scores for  
266 classification (Supplementary Figure S15). Together, these results suggest that scJoint performs  
267 the best among the unpaired methods and on par with the paired methods, despite treating paired  
268 data as separate.

## 269 **Discussion**

270 scJoint approaches the integration of scRNA-seq and scATAC-seq as a domain adaptation  
271 problem in transfer learning, using the same neural network to co-train labeled data from the

272 source domain (RNA) and unlabeled data from the target domain (ATAC) following a different  
273 distribution. scRNA-seq data serve as a natural source domain for transferring information to  
274 other modalities due to rapidly growing collections of annotated public data and RNA-focused  
275 computational tools that can output accurate classifications [38]. Using multiple cell atlases  
276 and multi-modal data with protein measurements, we demonstrate scJoint achieves significantly  
277 higher label transfer accuracy and provides better joint visualizations than other methods even  
278 when 1) the data is highly complex and heterogeneous and 2) meaningful biological conditions  
279 are mixed with technical variations. We have shown that integrative analysis of single-cell  
280 multi-omics data by scJoint facilitates re-annotation of cell types in scATAC-seq and discovery  
281 of new subtypes not present in training data.

282

283 scJoint provides a concise training framework with one main tuning parameter in the  
284 construction of cosine similarity loss. As shown in Supplementary Figure S16a, our results  
285 are quite stable with respect to the choice of this parameter. Similar to other methods based  
286 on neural networks, the number of hidden nodes in the architecture and other optimization  
287 details can be considered tunable as well, although they do not appear to affect our results  
288 (Supplementary Figure S16b).

289

290 The superior performance and robustness of scJoint illustrate its utility as a tool to au-  
291 tomatically label cells from other modalities given an annotated scRNA-seq database. By  
292 embedding all cells in a common lower dimensional space, scJoint assigns a probability score  
293 to a cell type prediction by combining the softmax probabilities of its nearest neighbors. As  
294 we vary the level of cutoff, the accuracy of scJoint still consistently outperforms the other  
295 methods (Supplementary Figure S17). The robustness of scJoint was demonstrated through  
296 subsampling experiments, where the stability of our results implies the method can be applied to  
297 partially labeled databases. Despite being a semi-supervised method guided by labeled data, the  
298 dimension reduction component in our design lends it sufficient flexibility to preserve implicit  
299 data signals, including biological variations induced by experimental conditions and additional  
300 cellular subtypes. One can conceivably extend scJoint to an unsupervised setting, replacing the  
301 softmax prediction layer with a decoder minimizing reconstruction loss.

302

303 Although designed for unpaired data, scJoint is still directly applicable to paired data  
304 and generates joint visualizations with cells coherently grouped by cell types. In the current

305 training scheme, the pairing information between RNA and ATAC is only used to validate the  
306 label transfer results. We expect that adapting scJoint to take paired vectors during training  
307 would enhance its performance on this type of data, and this would be especially useful in the  
308 unsupervised setting mentioned above.

309

310 We have focused on scATAC-seq as an example of epigenomic data, but in principle scJoint  
311 extends to other modalities such as methylation data, provided the input can be summarized  
312 as gene-level scores. While the gene-level summaries are amenable to generalization and  
313 widely adopted by unpaired integration methods, this step itself is also a limitation as improper  
314 aggregation can incur information loss. Extending scJoint to directly handle epigenomic data at  
315 locus level will require designing a separate encoder that is suitable for the high dimensionality  
316 and remains easy to train, and we will pursue this for future work.

317

318 In summary, we have developed scJoint as a generalizable transfer learning method for per-  
319 forming integrative analysis of atlas-scale single-cell multi-omics data. scJoint was shown to  
320 effectively integrate multiple types of measurements from both unpaired or paired profiling,  
321 outperforming other methods in label transfer accuracy and providing joint visualizations that  
322 remove technical variations while preserving meaningful biological signals. scJoint's ability to  
323 integrate multi-omics data by capturing various aspects of cell characteristics unique to different  
324 data modalities will facilitate a more comprehensive view of cell functions and cell communi-  
325 cations.

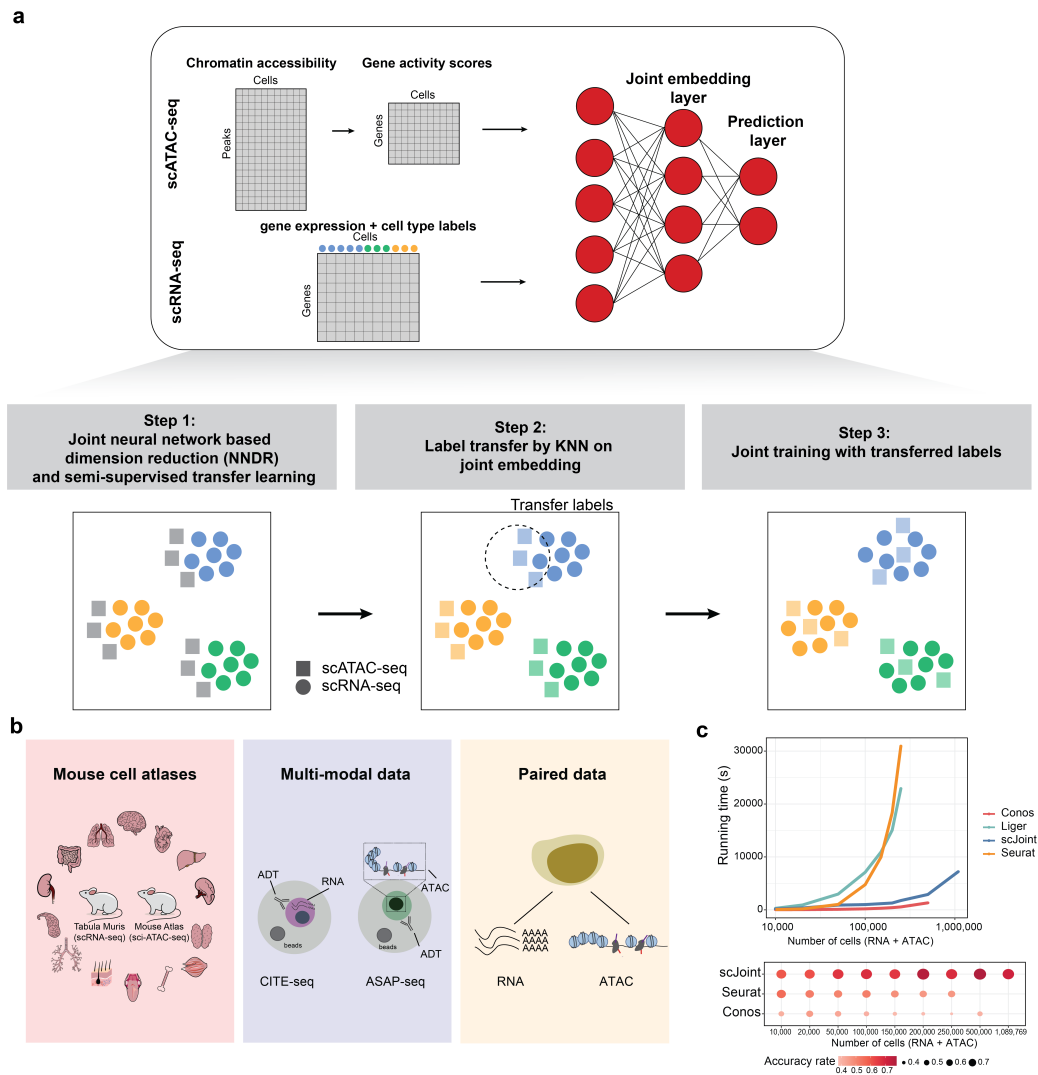

Figure 1: (a) Overview of scJoint. The input of scJoint consists of one (or multiple) gene activity score matrix, calculated from the accessibility peak matrix of scATAC-seq, and one (or multiple) gene expression matrix including cell type labels from scRNA-seq experiments. The method has three main steps: (1) Joint NNDR and semi-supervised transfer learning; (2) Cell type label transfer by k-nearest neighbor in joint embedding space; (3) Joint training with transferred labels. (b) Three data collections analyzed in detail in this study: (1) Mouse cell atlases; (2) Multi-modal data from PBMC; (3) Paired data from adult mouse cerebral cortex data generated by SNARE-seq. (c) Computation time required by different methods to integrate scRNA-seq and scATAC-seq (top) and their label transfer accuracy (bottom, computed for methods with label transfer functionality). The benchmark datasets were subsampled from 54 cell types in the human fetal atlases [27, 28], where the total number of RNA and ATAC cells ranges from 10000 to 1089769. Seurat and Liger were terminated for out of memory error on datasets with 500,000 cells and more, and Conos was terminated on the 1 million cell dataset.

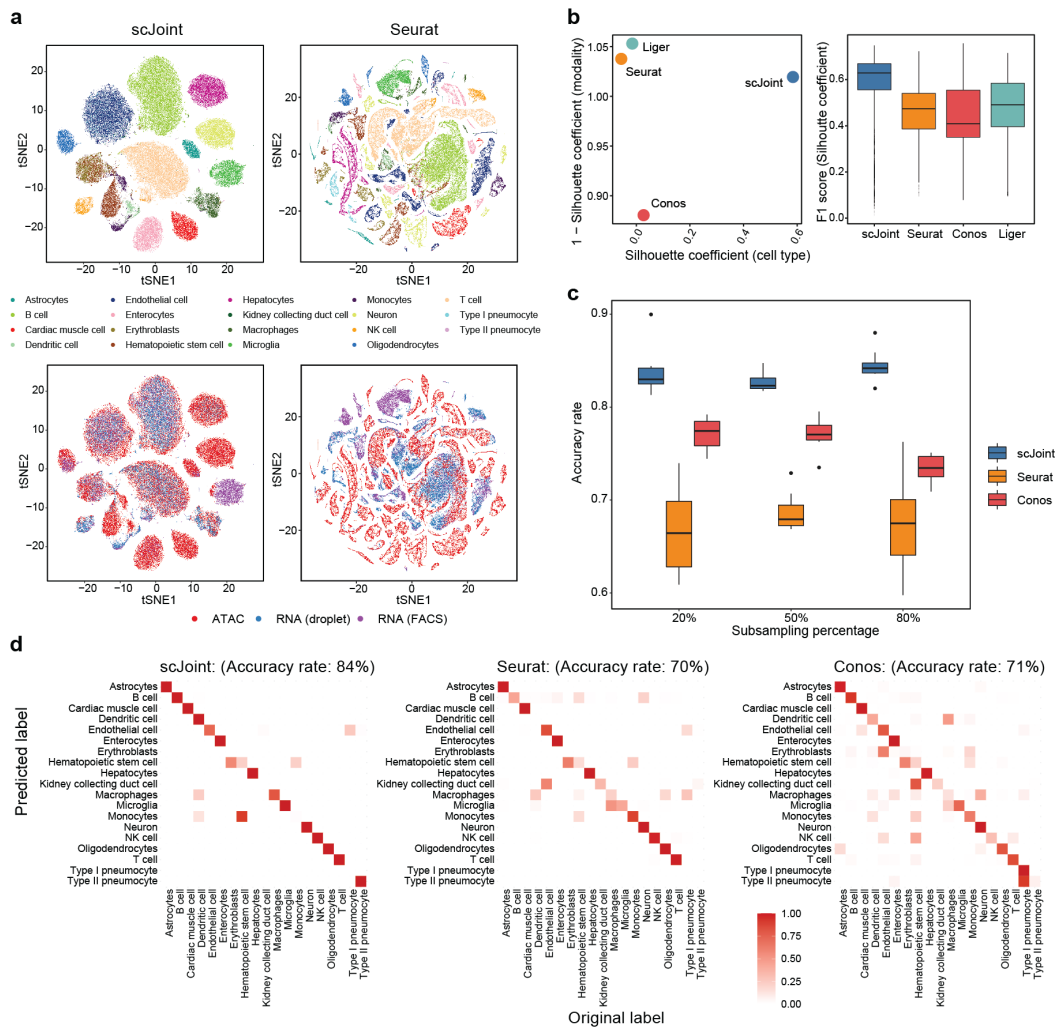

Figure 2: Analysis of mouse cell atlas subset data containing 19 overlapping cell types from RNA and ATAC. (a) tSNE visualization of scJoint (left column) and Seurat (right column), colored by cell types defined in [26] (first row) and three protocols (second row). (b) Scatter plot of mean silhouette coefficients for scJoint, Liger, Seurat, and Conos (left panel), where the x-axis shows the mean cell type silhouette coefficients and the y-axis shows ‘1 - mean modality silhouette coefficients’; ideal outcomes would lie in the top right corner. Boxplots of F1 scores of silhouette coefficients for scJoint, Liger, Seurat, and Conos (right panel). (c) Accuracy rates of scJoint, Seurat and Conos using 20%, 50% and 80% of cells from scRNA-seq data as training data. 10 random subsamplings were performed for each setting to generate the variance. (d) Predicted cell types and their fractions of agreement with the original cell types given in [26] for scJoint (left panel), Seurat (middle panel) and Conos (right panel). Clearer diagonal structure indicates better agreement.

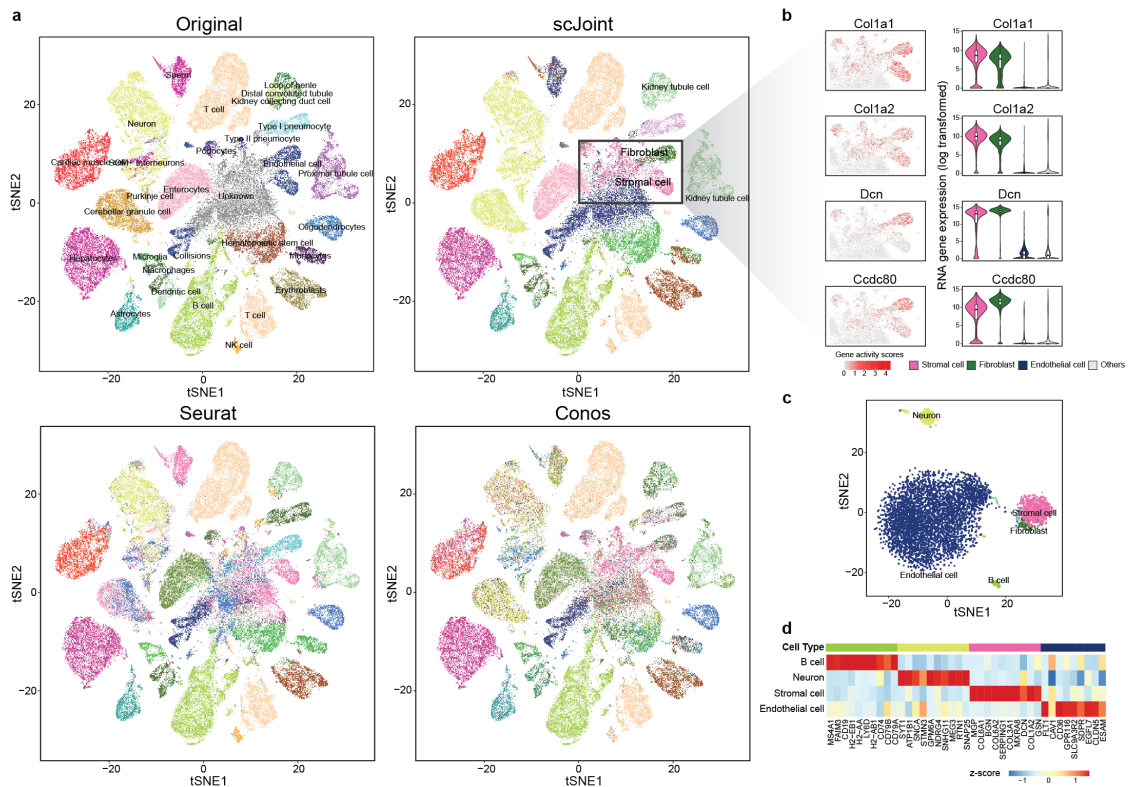

Figure 3: Analysis of mouse cell atlas full data. (a) A  $2 \times 2$  panel of tSNE plots generated from top 100 dimensions of singular value decomposition of the TF-IDF transformed ATAC-seq data, colored by the original labels (top left), scJoint transferred labels (top right), Seurat transferred labels (bottom left), and Conos transferred labels (bottom right). (b) Marker expressions in stromal cells and fibroblasts: Col1a1, Col1a2, Dcn and Ccdc80. The left column shows the gene activity scores of the markers in ATAC-seq data (4352 stromal cells, and 1602 fibroblasts). The right column shows the log-transformed gene expression of the markers in stromal cells, fibroblasts, endothelial cells versus others; all cells here are taken from the FACS scRNA-seq data. (c) tSNE plot of cells originally labeled as ‘unknown’ and annotated by scJoint with probability scores greater than 0.80, colored by predicted cell types (5931 cells). (d) Heatmap of z-scores of average gene activity scores, calculated from cells aggregated by predicted cell types in ATAC. The rows indicate the top four predicted cell types by size. The columns indicate the top differential expressed genes of the corresponding cell type in RNA.

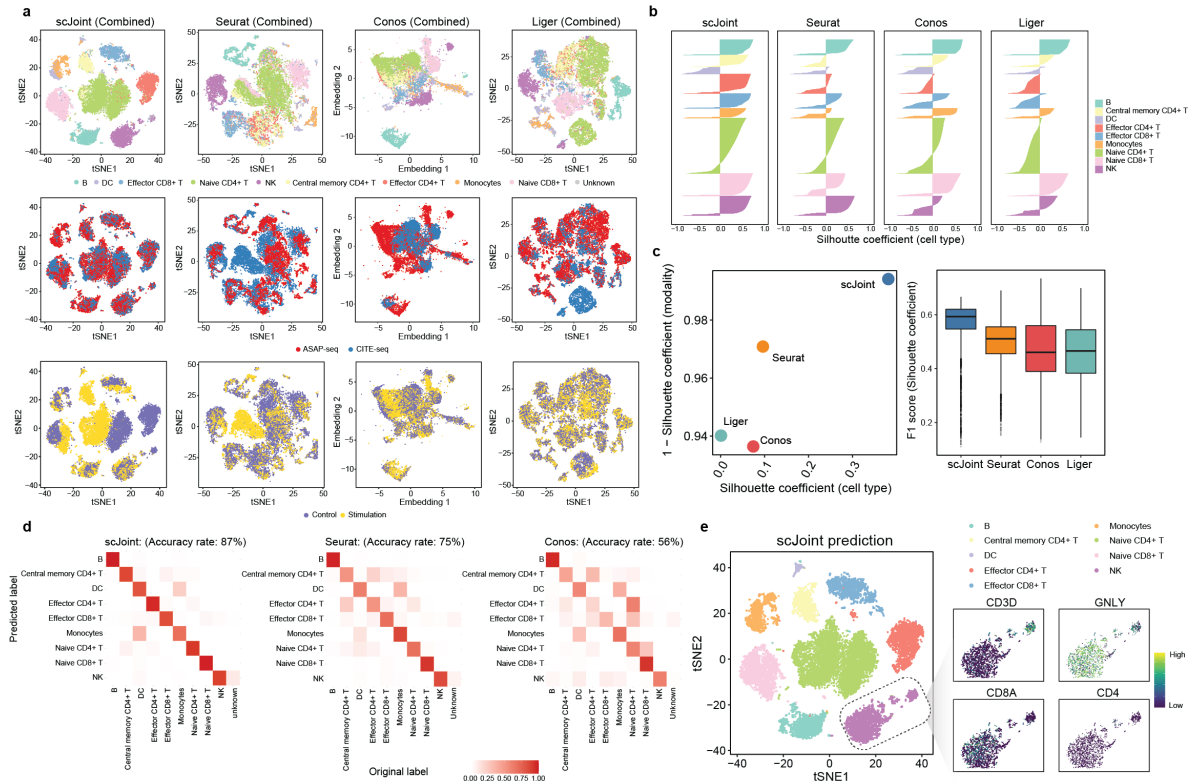

Figure 4: Integration of multi-modal PBMC data across biological conditions. (a) tSNE visualization of scJoint (first column), Seurat (second column), Conos (third column) and Liger (fourth column) of PBMC data generated from CITE-seq and ASAP-seq, colored by cell type obtained from CiteFuse and manual annotations (first row), technology (second row), and biological condition (third row). (b) Barplots of cell type silhouette coefficients for scJoint, Seurat, Conos and Liger for all cells, colored by cell type. Larger values on the x-axis indicate better grouping. (c) Scatter plot of mean silhouette coefficients for scJoint, Seurat, Conos and Liger (left), where the x-axis denotes the mean cell type silhouette coefficients, and the y-axis denotes 1 - mean modality silhouette coefficients; ideal outcomes would lie in the top right corner. Boxplots of F1 scores of silhouette coefficients for scJoint, Liger, Seurat, and Conos (right). (d) Heatmaps comparing the original labels and the transferred labels of scJoint, Seurat and Conos. Clearer diagonal structure indicates better agreement. (e) tSNE visualization of scJoint colored by the predicted cell types with gene expression levels of CD3D, NKG7, CD8A and CD4 in natural killer cells.

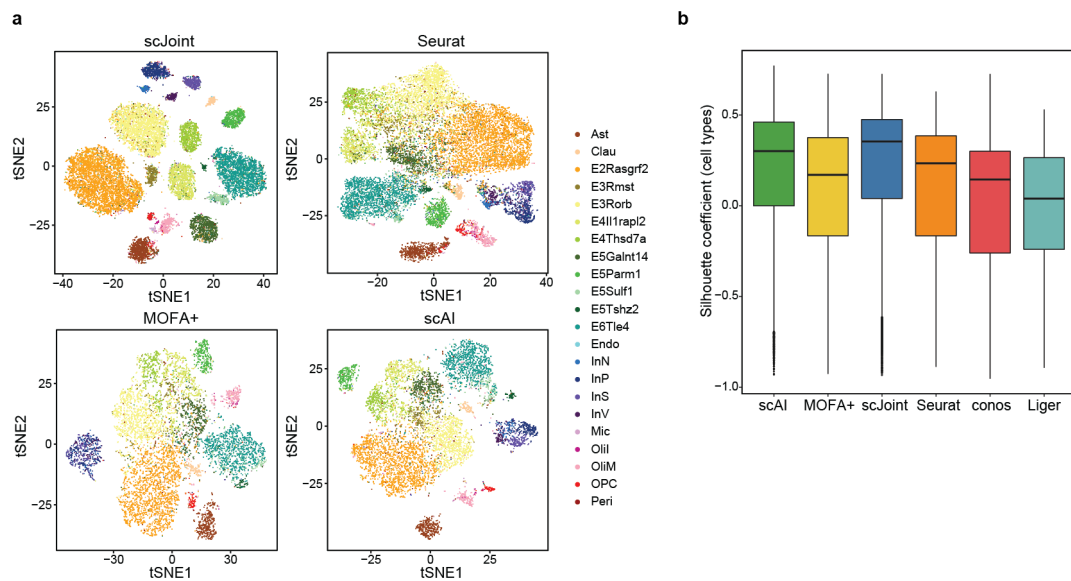

Figure 5: Analysis of paired gene expression and chromatin accessibility data from SNARE-seq. (a) tSNE visualization of SNARE-seq data for scJoint, Seurat, MOFA+ and scAI, colored by cell types given in [14]. All unpaired methods treat the RNA and ATAC parts of SNARE-seq as two separate data. (b) Boxplots of cell type silhouette coefficients for scJoint, Seurat, Conos and Liger, colored by methods.



## 326 **Methods**

### 327 **Architecture and training of scJoint**

328 The neural network in scJoint consists of one input layer and two fully connected layers. The  
329 input layer has dimension equal to the number of genes common to the expression matrix  
330 of scRNA-seq and the gene activity matrix of scATAC-seq, after simple filtering (see Data  
331 preprocessing). Now that the two modalities have matching input features, we co-train them  
332 using the same encoder which is equivalent to weight sharing. The first fully connected layer has  
333 64 neurons with linear activation and serves as the joint low dimensional embedding space that  
334 captures aligned features from all cells. visualizations of clustering structure can be obtained  
335 by applying tSNE or UMAP to the output of the embedding layer. The second fully connected  
336 layer has dimension equal to the number of cell types in scRNA-seq data. Through a softmax  
337 transformation, this layer outputs a probability vector for cell type prediction. For cells in  
338 scRNA-seq, this layer can be trained in a supervised fashion using the cross entropy loss.

339

340 Given  $S$  scRNA-seq experiments with expression matrices and  $T$  scATAC-seq experiments  
341 with gene activity score matrices, with  $S$  and  $T$  representing the number of different batches  
342 whose technical variations need to be removed. Assume suitable intersections have been taken  
343 so that all matrices have the same set of genes. Let  $\{x_i^{(s)}\}_{i=1}^{N_s}$  be the expression profiles of  
344 cells after preprocessing from a scRNA-seq dataset indexed by  $s \in \{1, \dots, S\}$ , and  $\{y_i^{(s)}\}_{i=1}^{N_s}$   
345 be the corresponding cell type annotations. Here each  $x_i^{(s)}$  is a  $G$ -dimensional vector, where  
346  $G$  is the number of genes;  $y_i^{(s)} \in \{1, \dots, K\}$ , where  $K$  is the number of cell types;  $N_s$  is  
347 the number of cells in experiment  $s$ . Similarly, let  $\{x_i^{(t)}\}_{i=1}^{N_t}$  be the vectors of gene activity  
348 scores after preprocessing from the  $t$ -th scATAC-seq dataset with  $N_t$  cells ( $t \in \{1, \dots, T\}$ ),  
349 whose cell types are unlabeled. The neural network is parametrized by a set of weights and  
350 biases, collectively denoted  $\theta$ . Let  $f_{\theta,i}^{(s)} = f(x_i^{(s)}; \theta) \in \mathbb{R}^D$ ,  $D = 64$ , be the output of the  
351 embedding layer when the input  $x_i^{(s)}$  has gone through a transformation of  $f$  parametrized by  
352  $\theta$ . Similarly  $g_{\theta,i}^{(s)} = \text{softmax}(h(f(x_i^{(s)}; \theta)))$ , where  $h$  denotes the output from the prediction  
353 layer that goes through the softmax transformation. Thus  $g_{\theta,i}^{(s)}$  is a probability vector after the  
354 softmax transformation.  $f_{\theta,i}^{(t)}$  and  $g_{\theta,i}^{(t)}$  are defined in the same way for input  $x_i^{(t)}$  from scATAC-seq.

355

356 The training of scJoint consists of three steps.

357 **Step 1: Joint neural network based dimension reduction (NNDR) and semi-supervised**  
 358 **transfer learning**

359 We first perform joint dimension reduction and feature alignment by imposing suitable loss  
 360 functions on the outputs of the two fully connected layers. A mini-batch  $\mathcal{B}_0$  of data for  
 361 training is constructed by sampling equal-sized subsets of cells from each dataset, that is,  
 362  $\mathcal{B}_0 = \{\mathcal{B}^{(s)}\}_{s=1}^S \cup \{\mathcal{B}^{(t)}\}_{t=1}^T$ , where each subset  $\mathcal{B}^{(s)}$  (or  $\mathcal{B}^{(t)}$ ) has  $B$  cells.

363 1. *NNDR Loss*. In a spirit similar to PCA, the NNDR loss aims to capture low dimensional,  
 364 orthogonal features when projecting each data batch into the embedding space. For now  
 365 we omit the dataset-specific superscript with the understanding that this loss function is  
 366 applied to each  $\mathcal{B}^{(s)}$  and  $\mathcal{B}^{(t)}$ . Given input vectors  $\{x_b\}_{b \in \mathcal{B}}$ , define  $\bar{f}_{\theta, \cdot} = \frac{1}{B} \sum_{b \in \mathcal{B}} f_{\theta, b} \in$   
 367  $\mathbb{R}^D$ , and  $\Sigma_{\theta, \cdot}$  as the sample correlation matrix. The NNDR loss is:

$$368 \mathcal{L}_{\text{NNDR}}(\mathcal{B}, \theta) = \left( \frac{1}{BD} \sum_{b \in \mathcal{B}} \sum_{j=1}^D |f_{\theta, b}(j) - \bar{f}_{\theta, \cdot}(j)| \right)^{-1} + \frac{1}{D^2} \sum_{i \neq j} |\Sigma_{\theta, \cdot}(i, j)|$$

$$369 + \frac{1}{BD} \sum_{b \in \mathcal{B}} \sum_{j=1}^D |\bar{f}_{\theta, \cdot}(j)|.$$

370 Note that to minimize this loss, we maximize the variability within each coordinate (inverse  
 371 of the first term) and minimize the correlation between all coordinate pairs (the second  
 372 term) to achieve orthogonality. The last term tries to fix the means of all coordinates  
 373 near zero for model identifiability, preventing  $\theta$  from drifting to unstable regions of the  
 374 parameter space. The last term tries to fix the means of all coordinates  
 375 near zero for model identifiability, preventing  $\theta$  from drifting to unstable regions of the  
 376 parameter space.

377 2. *Cosine similarity loss*. This loss is applied to the embedding layer outputs from  $\mathcal{B}^{(t)}$  and  
 378  $\mathcal{B}_R = \cup_{s=1}^S \{\mathcal{B}^{(s)}\}$ , for every  $t$ , and attempts to maximize the similarity between best  
 379 aligned ATAC and RNA data pairs. Let  $p$  be the fraction of data pairs we expect to have  
 380 high cosine similarity scores. Setting  $p < 1$  accounts for situations where RNA and ATAC  
 381 do not share all their cell types. We set  $p = 0.8$  for all the results presented in the paper,  
 382 and our results appear to be stable with respect to this parameter (Supplementary Figure  
 383 S16a) when the cell types fully overlap. Recall that for a pair of general vectors  $(u, v)$ , the  
 384 cosine similarity is defined as  $\cos(u, v) = \langle u, v \rangle / (\|u\| \|v\|)$ . For each  $x_b^{(t)}$  with  $b \in \mathcal{B}^{(t)}$ ,  
 385 we find the corresponding  $i(b) \in \mathcal{B}_R$  with input  $x_{i(b)}$  that maximizes  $\cos(f_{\theta, b}^{(t)}, f_{\theta, i(b)})$ . From  
 386  $\mathcal{B}^{(t)}$ , we then choose the top  $p$  fraction of cells with the highest cosine score and denote the  
 387 index set  $\mathcal{I}_p$ . ( $\mathcal{I}_p$  has size  $\lfloor Bp \rfloor$ .) The loss is given by

$$\mathcal{L}_{\text{cos}}(\mathcal{B}^{(t)}, \mathcal{B}_R, \theta) = -\frac{1}{[Bp]} \sum_{b \in \mathcal{I}_p} \text{cos}(f_{\theta,b}^{(t)}, f_{\theta,i(b)}).$$

3. *Cross entropy loss.* For every  $\mathcal{B}^{(s)}$  with cell type annotations  $\{y_b^{(s)}\}_{b \in \mathcal{B}^{(s)}}$ , we apply the cross entropy loss to the prediction layer after softmax transformation to supervise the learning of scRNA-seq datasets:

$$\mathcal{L}_{\text{entropy}}(\mathcal{B}^{(s)}, \theta) = -\frac{1}{B} \sum_{b \in \mathcal{B}^{(s)}} \sum_{k=1}^K 1(y_b^{(s)} = k) \log g_{\theta,b}^{(s)}(k),$$

where  $1(\cdot)$  is an indicator function.

In Step 1, the final loss function we minimise with respect to  $\theta$  for a mini-batch  $\mathcal{B}_0$  is

$$\mathcal{L}_1(\mathcal{B}_0, \theta) = \sum_{s=1}^S (\mathcal{L}_{\text{NNDR}}(\mathcal{B}^{(s)}, \theta) + \mathcal{L}_{\text{entropy}}(\mathcal{B}^{(s)}, \theta)) + \sum_{t=1}^T (\mathcal{L}_{\text{NNDR}}(\mathcal{B}^{(t)}, \theta) + \mathcal{L}_{\text{cos}}(\mathcal{B}^{(t)}, \mathcal{B}_R, \theta)).$$

## Step 2: Cell type label transfer by KNN in joint embedding space

The output of Step 1 is a joint embedding space that has roughly aligned RNA and ATAC with cells from either modality lying close if they have similar low dimensional representations in this space. Therefore using the embedding vectors for cells in all the datasets and calculating the Euclidean distances, we can determine the KNN among all RNA cells for each cell  $i$  in ATAC; denote this set of RNA cells  $\mathcal{N}(i)$ . The cell type label of  $i$  is estimated via majority vote using  $\{y_j\}_{j \in \mathcal{N}(i)}$ . All the results in the paper were obtained from using 30 nearest neighbors. Let the majority cell type be  $k^*$ , then the probability score of cell type prediction for cell  $i$  in ATAC is an average of its nearest neighbors in RNA. Since for each  $j \in \mathcal{N}(i)$ ,  $g_{\theta,j}$  is already a probability vector after the softmax transformation, we take  $p_{\theta,j} = g_{\theta,j}(k^*)$  as the probability score of RNA cell  $j$  in the majority class  $\mathcal{M}(i) \subset \mathcal{N}(i)$ . For other  $j \in \mathcal{N}(i) \setminus \mathcal{M}(i)$ , we threshold the probability score as 0. Then the probability score of ATAC cell  $i$  is calculated as

$$\hat{p}_{\theta,i} = \frac{1}{30} \sum_{j \in \mathcal{M}(i)} p_{\theta,j}.$$

## Step 3: Joint training with transferred cell type labels

In the final step of the training, we refine the joint embedding space and improve mixing of cells from the same cell type using the transferred labels from Step 2. We include an additional loss

415 function commonly used in metric learning for enhancing embedded clustering structure given  
416 labeled data. The other loss functions and network architecture remain the same as Step 1 with  
417 ATAC cells and their transferred labels added to  $\mathcal{L}_{\text{entropy}}$ .

418

419 For each cell type  $k \in \{1, \dots, K\}$ , we initialize the class center  $c_k \in \mathbb{R}^D$  randomly. We  
420 construct mini-batches of cells from all the datasets in the same way as Step 1. Now that all cells  
421 have cell type labels (given or transferred), for convenience we will refer to cells in a mini-batch  
422  $\mathcal{B}_0$  without explicitly labeling which dataset they come from. For a given  $\mathcal{B}_0$ , we first update the  
423 class centers by taking the average of  $c_k$  and  $\{f_{\theta,b}\}$  with  $b \in \mathcal{B}_0$  and  $y_b = k$ . Let the updated  
424 centers be  $c'_k$ . As the number of mini-batches grows, the influence of the initial  $c_k$  becomes  
425 negligible. The metric learning loss we use is the center loss:

$$426 \quad \mathcal{L}_{\text{center}}(\mathcal{B}_0, \theta) = \frac{1}{|\mathcal{B}_0|K} \sum_{b \in \mathcal{B}_0} \sum_{k=1}^K \|f_{\theta,b} - c'_k\|^2 \mathbf{1}(y_b = k).$$

427

428 The total loss function we minimise in Step 3 is given by

$$429 \quad \mathcal{L}_{\text{scJoint}}(\mathcal{B}_0, \theta) = \mathcal{L}_1(\mathcal{B}_0, \theta) + \mathcal{L}_{\text{center}}(\mathcal{B}_0, \theta).$$

430

431 We perform a final round of majority vote by KNN using distances in the embedding space.  
432 If the prediction of any ATAC cell is different from Step 2, we update both its prediction and  
433 probability score in the same way as Step 2. Before visualization with tSNE, all embedding  
434 vectors are normalized using  $L_2$  norm.

## 435 **Training details**

436 The batch size  $B$  was set to 256 in all cases. The other training details including learning rate  
437 and number of training epochs used in each dataset can be found in Table S1. We started all the  
438 training with learning rate set to 0.01, since a large learning rate has the benefit of faster training.  
439 However, if the values of the loss functions were observed to have too much fluctuation, we  
440 decreased the learning rate to 0.001 for more stable training.

## 441 **Data preprocessing**

442 • *Mouse atlas data.* The processed gene expression matrix and the cell type annota-  
443 tion of the Tabula Muris mouse data of scRNA-seq were downloaded from <https://tabula-muris.ds.czbiohub.org/>, which have 41965 cells from protocol

445 fluorescence-activated cell sorting (FACS) and 54439 cells from microfluidic droplets  
446 (droplet). The quantitative gene activity score matrix and the cell type annotation of Mouse  
447 sci-ATAC-seq Atlas were downloaded from [https://atlas.gs.washington.](https://atlas.gs.washington.edu/mouse-atac/)  
448 [edu/mouse-atac/](https://atlas.gs.washington.edu/mouse-atac/), including 81173 cells in total. The number of common genes be-  
449 tween two modalities is 15519. We manually checked the cell type annotations from the  
450 original studies and re-annotated the labels such that the naming convention is consistent  
451 across the datasets. For example, the cell type “Cardiac muscle cell” in the sci-ATAC-seq  
452 dataset was changed to “Cardiomyocytes”. We also combined some of the cellular sub-  
453 types in the sci-ATAC-seq data to increase the percentage of overlapping labels between  
454 two atlases for evaluation. More specifically, we combined “Regulatory T cell” and “T  
455 cell” into “T cell”; “Immature B cell”, “Activated B cell” and “B cell” into “B cell”; “Ex-  
456 citatory neurons” and “Inhibitory neurons” into “Neuron”.

- 457 • *Human fetal atlas data.* The scRNA-seq data of the human fetal atlas data was downloaded  
458 from GSE156793, including both raw gene expression and cell type information [27].  
459 The scATAC-seq data was downloaded from GSE149683, and the gene activity matrices  
460 were extracted from the Seurat objects provided [28]. There are 54 cell types common  
461 between the two human fetal atlases. In our computational benchmarking analysis, we  
462 only included cells from the common cell types, resulting in a total of 656,074 cells from  
463 the scATAC-seq data. To construct a balanced scRNA-seq training set, for cell type  $i$  with  
464 number of cells  $n_i > 10,000$ , we subsampled  $\max\{0.05n_i, 10,000\}$  cells; all cells were  
465 included for cell types with less than 10,000 cells. This resulted in 433,695 cells from the  
466 scRNA-seq data.
- 467 • *SNARE-seq data.* The SNARE-seq data from adult mouse cerebral cortex was downloaded  
468 from the National Center for Biotechnology Information (NCBI) Gene Expression Om-  
469 nibus (GEO) accession number GSE126074 [14], with both raw gene expression and DNA  
470 accessibility measurements available for the same cell. The fastq files were downloaded  
471 from the Sequence Read Archive (SRA) for SRP183521. We first derived the fragment  
472 files from the fastq files using `sinto fragments` (`sinto v0.7.2`), and then generated  
473 the gene activity matrix using `Signac` (`v1.1.0.9000`) [32]. The cell type information was  
474 obtained from the original study [14]. We filtered out the cells that were originally labeled  
475 as “Misc” (cells of miscellaneous cluster), resulting in a dataset with 9190 cells and 15725  
476 genes for the integrative analysis.

477 • *Multi-modal data (CITE-seq and ASAP-seq PBMC data)*. The ASAP-seq and CITE-seq  
478 data were downloaded from GEO accession number GSE156478 [34], which included the  
479 fragment files and antibody-derived tags (ADTs) matrices for ASAP-seq, the raw unique  
480 molecular identifier (UMI) and ADT matrices for CITE-seq, from both control and stim-  
481 ulated conditions. The gene activity matrices for ASAP-seq were generated by Signac.  
482 Most of the thresholds we used for quality control metrics were consistent with those in  
483 the original paper [34]. The control and stimulated CITE-seq were filtered based on the  
484 following criteria: mitochondrial reads greater than 10%; number of expressed genes less  
485 than 500; total number of UMI less than 1000; total number of ADTs from the rat iso-  
486 type control greater 55 and 65 in the control and stimulated conditions respectively; total  
487 number of UMI greater than 12,000 and 20,000 for the control and stimulated conditions  
488 respectively; total number of ADTs less than 10,000 and 30,000 for control and stimulated  
489 conditions respectively. We further filtered out cells that were classified as doublets in  
490 original study. For the ASAP-seq data, we filtered out cells with the number ADTs more  
491 than 10,000 and number of peaks more than 100,000. Finally, 4502 cells (control) and  
492 5468 cells (stimulated) from ASAP-seq, 4644 cells (control) and 3474 cells (stimulated)  
493 from CITE-seq were included in the downstream analysis. The number of common genes  
494 across the four matrices is 17441 and the number of common ADTs is 227. We used  
495 CiteFuse to integrate the peak matrix or gene expression matrix with their corresponding  
496 protein expression and obtain clustering for ASAP-seq and CITE-seq within each condi-  
497 tion separately [35]. For ASAP-seq, the similarity matrices of the chromatin accessibility  
498 are calculated by applying the Pearson correlation to the TF-IDF transformation of the  
499 peak matrix. We then followed the procedure described in [39] to annotate the clusters.

500 For scJoint, all the gene expression matrices and gene activity score matrices were binarized  
501 as 0 or 1, with 1 representing any non-zero original values, as the final input for training. Bina-  
502 rization scales the two modalities so that their distributions have the same range and reduces the  
503 noise level in the data for easier co-training.

## 504 **Settings used in other methods**

505 For the unpaired data (mouse cell atlases and multi-modal data from CITE-seq and ASAP-seq),  
506 we benchmarked the performance of scJoint against three other methods designed for integrating  
507 unpaired single-cell multi-modal data: Seurat (v3), Conos and Liger. We compared the label

508 transfer accuracy with Seurat and Conos and the joint visualizations with all three methods.  
509 For the paired data (SNARE-seq), we further compared joint visualizations with two methods  
510 specifically designed for paired data, scAI and MOFA+. For all the unpaired methods, we used  
511 gene activity matrices derived from the above data preprocessing step as input for scATAC-seq.  
512 For the two paired methods, we used the peak matrices of scATAC-seq data as input. Detailed  
513 settings used in each method are as follows.

514 • *Seurat*. R package Seurat v3.2.0 [24] was used for all the datasets. The raw count  
515 matrix of scRNA-seq and unnormalized gene activity score matrix of scATAC-seq were  
516 used as input, which were then normalized using the `NormalizeData` function in Seu-  
517 rat. Noted that for the CITE-seq and ASAP-seq data, the input was a concatenated  
518 matrix of log-transformed normalized gene expression data/gene activity score matrix  
519 and log-transformed ADTs matrix. Top 2000 most variable genes were selected from  
520 scRNA-seq using `FindVariableFeatures` with `vst` as method. To identify the an-  
521 chors between scRNA-seq and scATAC-seq data, `FindTransferAnchors` function  
522 was used with “cca” as reduction method. The scATAC-seq data was then imputed using  
523 `TransferAnchors` function, where the anchors were weighted by latent semantic in-  
524 dexing (LSI) reduced dimension of scATAC-seq. Principal component analysis was then  
525 performed on the merged matrix of scRNA-seq data and imputed scATAC-seq data. For all  
526 the datasets, 30 principal components (PCs) were used for joint visualization with tSNE  
527 (function `RunTSNE`).

528 For the mouse cell atlas data, we first integrated the two scRNA-seq datasets (FACS and  
529 droplet) using `FindIntegrationAnchors` and `IntegrateData`, and then the inte-  
530 grated matrix was scaled using `ScaleData` and used as reference to find transfer anchors.

531 • *Conos*. R package `conos` v1.3.1 [23] was used for all the datasets. Function  
532 `basicP2proc` in `pagoda2` package (v0.1.2) was performed to process the raw  
533 count matrix of scRNA-seq and unnormalized gene activity score matrix of scATAC-  
534 seq. The joint graph was built using `buildGraph` with `k=15`, `k.self=5`, and  
535 `k.self.weigh=0.01`, which were set as suggested in the tutorial for integrating  
536 RNA and ATAC ([http://pklab.med.harvard.edu/peterk/conos/atac\\_](http://pklab.med.harvard.edu/peterk/conos/atac_rna/example.html)  
537 [rna/example.html](http://pklab.med.harvard.edu/peterk/conos/atac_rna/example.html)). The joint visualization of scRNA-seq and scATAC-seq were  
538 generated using `largeVis` by `embedGraph`, which is the default visualization in Conos.

- 539 • *Liger*. R package `liger` v0.5.0 [21] was used for the datasets. The raw count matrix of  
540 scRNA-seq and unnormalized gene activity score matrix of scATAC-seq were used as in-  
541 put, which were normalized using `normalize` function in `liger`. Highly variable genes  
542 were selected using the scRNA-seq. For the mouse cell atlas data, both FACS and droplet  
543 scRNA-seq data were used to select features. For all the datasets, number of factors was  
544 set to 20 in `optimizeALS`. tSNE was then performed on the normalized cell factors  
545 to generate the joint visualization of scRNA-seq and scATAC-seq (function `runTSNE` in  
546 `liger`).
- 547 • *scAI*. R package `scAI` v1.0.0 [16] was used for the integration of SNARE-seq data. The raw  
548 count matrix of scRNA-seq and raw peak matrix of scATAC-seq were used as input. We  
549 ran `scAI` using `run_scAI` by setting the rank of the inferred factor set as 20, `do.fast =`  
550 `TRUE`, and `nrun = 1`, with other parameters set as default, as suggested in the pipeline in  
551 the github repository. tSNE plots were generated using `reducedDims` function in `scAI`.
- 552 • *MOFA+*. R package `MOFA2` v1.0 [17] was used for the integration of SNARE-seq data.  
553 Following the suggested integration tutorial for SNARE-seq in the github repository, we  
554 first selected top 2500 most variable genes using `FindVariableFeatures` in `Seurat`  
555 package with `vst` as method and top 5000 most variable ATAC peaks with `disp` as  
556 method. By subsetting the counts matrix of scRNA-seq and peak matrix of scATAC-seq  
557 with the selected features, we ran `MOFA+` by setting the number of factors as 10, with  
558 other parameters set as default. tSNE plots were generated using `run_tsne` function in  
559 `MOFA2`.

## 560 Evaluation metrics

### 561 Joint embedding evaluation - Silhouette coefficients

562 To evaluate whether the joint embeddings from different methods show clustering structure  
563 reflecting biological signals or technical variations, we calculated the silhouette coefficient  
564 for each cell by considering two different groupings: (1) grouping based on the modalities  
565 (scRNA-seq or scATAC-seq), called the modality silhouette coefficient ( $s_{modality}$ ); (2) grouping  
566 based on known cell types, called the cell type silhouette coefficient ( $s_{cellTypes}$ ). Note that for  
567 the atlas data, we consider FACS and droplet in scRNA-seq as two distinct technologies and the  
568 modality silhouette coefficient has three groups (FACS, droplet, ATAC) in the calculation. For



569 SNARE-seq, the paired methods (scAI and MOFA+) have no modality silhouette coefficients  
570 since each cell has one paired profile of RNA and ATAC. An ideal joint visualization should have  
571 low modality silhouette coefficients, suggesting the removal of the technical effect, and large  
572 cell type silhouette coefficients, indicating the cells are grouped by cell types. The euclidean  
573 distance for all methods except Conos is obtained from the tSNE embedding. For Conos, the  
574 distance is obtained from the `largeVis` embedding, which is the method's default output.

575

576 We then summarize the two silhouette coefficients by calculating an F1-score as follows:

$$577 F1_{sil} = \frac{2 \cdot (1 - s'_{modality}) \cdot s'_{cellTypes}}{1 - s'_{modality} + s'_{cellTypes}},$$

578 where  $s' = (s + 1)/2$ . A higher F1 score indicates better performance in the alignment of the  
579 modalities as well as the preservation of biological signals.

### 580 Accuracy evaluation of transferred labels

581 We evaluated the accuracy of label transfer from two aspects: (1) Overall accuracy rate; (2)  
582 Cell type classification F1-score. The overall accuracy rate was computed only accounting for  
583 the common cell types between scRNA-seq and scATAC-seq data. The cell type classification  
584 F1-score is the harmonic mean of precision and recall of each cell type.

### 585 Running time evaluation

586 The running time evaluation was performed using one core and one GPU on a research server  
587 with dual Intel (R) Xeon(R) Gold 6148 Processor (40 total cores, 768 GB total memory) and  
588 dual RTX2080TI GPUs. Using the preprocessed human fetal atlas data, we created benchmark-  
589 ing datasets with 5000, 10000, 25000, 50000, 75000, 100000, 125000 and 250000 cells from  
590 scRNA-seq and scATAC-seq data respectively. We further ran scJoint on the whole preprocessed  
591 data with 433,695 cells from scRNA-seq and 656,074 cells from scATAC-seq. In this case, the  
592 other three methods failed to run due to an out of memory error. For each method, we measured  
593 total running time as the running time of feature selection, label transfer and joint embedding  
594 construction of scATAC-seq and scRNA-seq. The training details for scJoint are listed in Table  
595 S2. Following common practice in neural network training, we increased the batch size as the  
596 number of training data increased.

## 597 **Software availability**

598 scJoint was implemented using PyTorch (version 1.0.0) with code available at [https://](https://github.com/SydneyBioX/scJoint)  
599 [github.com/SydneyBioX/scJoint](https://github.com/SydneyBioX/scJoint).

## 600 **Acknowledgments**

601 The authors gratefully acknowledge the following funding sources: Research Training Program  
602 Tuition Fee Offset and Stipend Scholarship and Chen Family Research Scholarship to Y.L.; Aus-  
603 tralian Research Council Discovery Project grant (DP170100654) to J.Y.H.Y.; Australian Re-  
604 search Council DECRA Fellowship (DE180101252) to Y.X.R.W; NIH grants R01 HG010359  
605 and P50 HG007735 to W.H.W.

## 606 **Author contributions**

607 T.W., W.H.W. and Y.X.R.W. conceived and designed this project; Y.L., T.W. and S.W. per-  
608 formed data preprocessing, model development, and evaluation of results; J.Y.H.Y., W.H.W. and  
609 Y.X.R.W. supervised the execution; Y.L., J.Y.H.Y., W.H.W. and Y.X.R.W. wrote the manuscript.  
610 All authors read and approved the manuscript.

## 611 **Conflict of interest**

612 The authors declare that they have no conflict of interest.

## 613 **References**

- 614 1. Stuart, T. & Satija, R. Integrative single-cell analysis. *Nature Reviews Genetics* **20**, 257–  
615 272 (2019).
- 616 2. Berger, S. L. The complex language of chromatin regulation during transcription. *Nature*  
617 **447**, 407–412 (2007).
- 618 3. Klemm, S. L., Shipony, Z. & Greenleaf, W. J. Chromatin accessibility and the regulatory  
619 epigenome. *Nature Reviews Genetics* **20**, 207–220 (2019).
- 620 4. Pott, S. & Lieb, J. D. Single-cell ATAC-seq: strength in numbers. *Genome Biology* **16**, 172  
621 (2015).
- 622 5. Schaum, N. *et al.* Single-cell transcriptomics of 20 mouse organs creates a Tabula Muris:  
623 The Tabula Muris Consortium. *Nature* **562**, 367 (2018).
- 624 6. Regev, A. *et al.* Science forum: the human cell atlas. *Elife* **6**, e27041 (2017).
- 625 7. Lopez, R., Regier, J., Cole, M. B., Jordan, M. I. & Yosef, N. Deep generative modeling for  
626 single-cell transcriptomics. *Nature methods* **15**, 1053–1058 (2018).
- 627 8. Wang, J. *et al.* Data denoising with transfer learning in single-cell transcriptomics. *Nature*  
628 *methods* **16**, 875–878 (2019).
- 629 9. Lin, Y. *et al.* scMerge leverages factor analysis, stable expression, and pseudoreplication  
630 to merge multiple single-cell RNA-seq datasets. *Proceedings of the National Academy of*  
631 *Sciences* **116**, 9775–9784 (2019).
- 632 10. Korsunsky, I. *et al.* Fast, sensitive and accurate integration of single-cell data with Harmony.  
633 *Nature methods*, 1–8 (2019).
- 634 11. Wang, T. *et al.* BERMUDA: a novel deep transfer learning method for single-cell RNA  
635 sequencing batch correction reveals hidden high-resolution cellular subtypes. *Genome bi-*  
636 *ology* **20**, 1–15 (2019).
- 637 12. Amodio, M. *et al.* Exploring single-cell data with deep multitasking neural networks. *Na-*  
638 *ture methods*, 1–7 (2019).
- 639 13. Xiong, L. *et al.* SCALE method for single-cell ATAC-seq analysis via latent feature extrac-  
640 tion. *Nature communications* **10**, 1–10 (2019).
- 641 14. Chen, S., Lake, B. B. & Zhang, K. High-throughput sequencing of the transcriptome and  
642 chromatin accessibility in the same cell. *Nature biotechnology* **37**, 1452–1457 (2019).

- 643 15. Cao, J. *et al.* Joint profiling of chromatin accessibility and gene expression in thousands of  
644 single cells. *Science* **361**, 1380–1385 (2018).
- 645 16. Jin, S., Zhang, L. & Nie, Q. scAI: an unsupervised approach for the integrative analysis  
646 of parallel single-cell transcriptomic and epigenomic profiles. *Genome biology* **21**, 1–19  
647 (2020).
- 648 17. Argelaguet, R. *et al.* MOFA+: a statistical framework for comprehensive integration of  
649 multi-modal single-cell data. *Genome Biology* **21**, 1–17 (2020).
- 650 18. Welch, J. D., Hartemink, A. J. & Prins, J. F. MATCHER: manifold alignment reveals cor-  
651 respondence between single cell transcriptome and epigenome dynamics. *Genome biology*  
652 **18**, 1–19 (2017).
- 653 19. Amodio, M. & Krishnaswamy, S. MAGAN: Aligning biological manifolds. *arXiv preprint*  
654 *arXiv:1803.00385* (2018).
- 655 20. Liu, J., Huang, Y., Singh, R., Vert, J.-P. & Noble, W. S. Jointly embedding multiple single-  
656 cell omics measurements. *BioRxiv*, 644310 (2019).
- 657 21. Welch, J. D. *et al.* Single-cell multi-omic integration compares and contrasts features of  
658 brain cell identity. *Cell* **177**, 1873–1887 (2019).
- 659 22. Duren, Z. *et al.* Integrative analysis of single-cell genomics data by coupled nonnegative  
660 matrix factorizations. *Proceedings of the National Academy of Sciences* **115**, 7723–7728  
661 (2018).
- 662 23. Barkas, N. *et al.* Joint analysis of heterogeneous single-cell RNA-seq dataset collections.  
663 *Nature methods* **16**, 695–698 (2019).
- 664 24. Stuart, T. *et al.* Comprehensive integration of single-cell data. *Cell* **177**, 1888–1902 (2019).
- 665 25. Dai Yang, K. *et al.* Multi-domain translation between single-cell imaging and sequencing  
666 data using autoencoders. *Nature Communications* **12**, 1–10 (2021).
- 667 26. Cusanovich, D. A. *et al.* A single-cell atlas of in vivo mammalian chromatin accessibility.  
668 *Cell* **174**, 1309–1324 (2018).
- 669 27. Cao, J. *et al.* A human cell atlas of fetal gene expression. *Science* **370** (2020).
- 670 28. Domcke, S. *et al.* A human cell atlas of fetal chromatin accessibility. *Science* **370** (2020).
- 671 29. Maaten, L. v. d. & Hinton, G. Visualizing data using t-SNE. *Journal of machine learning*  
672 *research* **9**, 2579–2605 (2008).

- 673 30. McInnes, L., Healy, J. & Melville, J. Umap: Uniform manifold approximation and projec-  
674 tion for dimension reduction. *arXiv preprint arXiv:1802.03426* (2018).
- 675 31. Pliner, H. A. *et al.* Cicero predicts cis-regulatory DNA interactions from single-cell chro-  
676 matin accessibility data. *Molecular cell* **71**, 858–871 (2018).
- 677 32. Stuart, T., Srivastava, A., Lareau, C. & Satija, R. Multimodal single-cell chromatin analysis  
678 with Signac. *bioRxiv* (2020).
- 679 33. Stoeckius, M. *et al.* Simultaneous epitope and transcriptome measurement in single cells.  
680 *Nature methods* **14**, 865 (2017).
- 681 34. Mimitou, E. P. *et al.* Scalable, multimodal profiling of chromatin accessibility and protein  
682 levels in single cells. *bioRxiv* (2020).
- 683 35. Kim, H. J., Lin, Y., Geddes, T. A., Yang, J. Y. H. & Yang, P. CiteFuse enables multi-modal  
684 analysis of CITE-seq data. *Bioinformatics* **36**, 4137–4143 (2020).
- 685 36. Godfrey, D. I., MacDonald, H. R., Kronenberg, M., Smyth, M. J. & Van Kaer, L. NKT  
686 cells: what's in a name? *Nature Reviews Immunology* **4**, 231–237 (2004).
- 687 37. Finak, G. *et al.* MAST: a flexible statistical framework for assessing transcriptional changes  
688 and characterizing heterogeneity in single-cell RNA sequencing data. *Genome biology* **16**,  
689 1–13 (2015).
- 690 38. Abdelaal, T. *et al.* A comparison of automatic cell identification methods for single-cell  
691 RNA sequencing data. *Genome biology* **20**, 194 (2019).
- 692 39. Maecker, H. T., McCoy, J. P. & Nussenblatt, R. Standardizing immunophenotyping for the  
693 human immunology project. *Nature Reviews Immunology* **12**, 191–200 (2012).
